# Supplementary material for: Ab initio prediction of specific phospholipid complexes and membrane association of HIV-1 MPER antibodies by multi-scale simulations
Source: eLife. 2025 Apr 7;12:RP90139. doi: 10.7554/eLife.90139 (PMC11975376; doi:10.7554/eLife.90139)
Supplement: Figure 2—figure supplement 1—source data 1. — Mean and standard deviation for CDRL loop depths, CDRH loops depths and angles of approach and rotation extracted from each substate are reported. [file elife-90139-fig2-figsupp1-data1.xlsx]

## Sheet: Sheet1
	CDRL1 Depth				CDRH1 Depth
Cluster	Mean	Standard Deviation		Cluster	Mean	Standard Deviation
Yellow	10.37	2.72		Yellow	3.28	2.28
Orange	8.35	3.12		Orange	3.96	2.21
Purple	7.24	2.29		Purple	3.02	2.04
Green	8.47	1.44		Green	29.81	3.12
Red	7.8	1.67		Red	21.33	2.72
Cyan	11.41	2.32		Cyan	11.57	3.55
	CDRL2 Depth				CDRH2 Depth
Cluster	Mean	Standard Deviation		Cluster	Mean	Standard Deviation
Yellow	12.27	2.55		Yellow	1.1	1.7
Orange	7.11	2.5		Orange	5	1.56
Purple	8.3	1.9		Purple	2.38	1.54
Green	7.72	1.94		Green	27.77	2.31
Red	5.16	1.56		Red	20.71	2.14
Cyan	5.77	2.02		Cyan	13.51	3.91
	CDRL3 Depth				CDRH3 Depth
Cluster	Mean	Standard Deviation		Cluster	Mean	Standard Deviation
Yellow	11.94	2.31		Yellow	5.96	2.49
Orange	12.05	2.31		Orange	3.54	1.3
Purple	10.34	2		Purple	3.95	1.38
Green	16.48	1.58		Green	15.31	2.04
Red	15.29	1.67		Red	10.74	1.55
Cyan	16.65	2.03		Cyan	8.57	1.6
	Approach Angle				Rotation Angle
Cluster	Mean	Standard Deviation		Cluster	Mean	Standard Deviation
Yellow	71.24	5.26		Yellow	9.42	5.64
Orange	67.25	5.22		Orange	-13.31	5.79
Purple	80.2	4.16		Purple	-2.86	5.06
Green	34.96	5.23		Green	-29.46	5.66
Red	46.9	5.41		Red	-9.83	5.55
Cyan	43.41	6.17		Cyan	11.27	10.22
