# Supplementary material for: Ab initio prediction of specific phospholipid complexes and membrane association of HIV-1 MPER antibodies by multi-scale simulations
Source: eLife. 2025 Apr 7;12:RP90139. doi: 10.7554/eLife.90139 (PMC11975376; doi:10.7554/eLife.90139)
Supplement: Figure 2—figure supplement 3—source data 1. — Lipid interacting loop fragments from MD simulations or crystal structures were queried against structural database and hits were filtered to include ligands within 1.5 angstroms from experimental or simulation predicted phosphate or choline interactions. Relevant information for hits from each queried loop fragment includes PDB code, structural entry name in The Protein Data Bank, bound ligand ID, organism from which the protein structure is isolated, and functional classification. Number of fragments found based on a range of RMSD cutoffs for structural searches with phosphate binding fragments of MPER bnAbs as input query structures. Intermediate stringency is found at a 2Å RMSD cutoff. Identified hits with a 2Å RMSD cutoff using MPER bnAb phosphate binding fragments as queries compared to other structural queries with similar length but distinct topologies. [file elife-90139-fig2-figsupp3-data1.xls]

## Sheet: supp_table1_structural_hits_dat
PDB ID	Structural Match	Molecule Name	Ligand Name	Organism	Classification
3Q94	pgzl1_ligand_1.5_RMSD	the crystal structure of fructose 1,6-bisphosphate aldolase from bacillus anthracis str. 'ames ancestor'	13P	bacillus anthracis	lyase
3GN3	pgzl1_ligand_1.5_RMSD	crystal structure of a putative protein-disulfide isomerase from pseudomonas syringae to 2.5a resolution.	SO4	pseudomonas syringae pv. tomato	structural genomics, unknown function
1GVF	pgzl1_ligand_1.5_RMSD	structure of tagatose-1,6-bisphosphate aldolase	PGH	escherichia coli	lyase
5MQQ	4e10_ligand_1.5_RMSD	transcriptional repressor amtr of corynebacterium glutamicum	SO4	corynebacterium glutamicum	transcription
2AIB	pgzl1_ligand_1.5_RMSD	beta-cinnamomin in complex with ergosterol	MES	phytophthora cinnamomi	toxin
3QM3	4e10_ligand_1.5_RMSD	1.85 angstrom resolution crystal structure of fructose-bisphosphate aldolase (fba) from campylobacter jejuni	SO4	campylobacter jejuni	lyase
4H4F	pgzl1_ligand_1.5_RMSD	crystal structure of human chymotrypsin c (ctrc) bound to inhibitor eglin c from hirudo medicinalis	PO4	homo sapiens	hydrolase/hydrolase inhibitor
7NC7	pgzl1_ligand_1.5_RMSD	crystal structure of fructose-bisphosphate aldolases fbac from bacillus methanolicus	13P	bacillus methanolicus (strain mga3 / atcc53907)	lyase
3KDW	10E8_xray_ligand_1.5_RMSD	crystal structure of putative sugar binding protein (yp_001300177.1) from bacteroides vulgatus atcc 8482 at 1.70 a resolution	PO4	bacteroides vulgatus atcc 8482	sugar binding protein
3FP3	10E8_xray_ligand_1.5_RMSD	crystal structure of tom71	SO4	saccharomyces cerevisiae	transport protein
4I42	10E8_xray_ligand_1.5_RMSD	e.coli. 1,4-dihydroxy-2-naphthoyl coenzyme a synthase (ecmenb) in complex with 1-hydroxy-2-naphthoyl-coa	SO4	escherichia coli	lyase
3EUP	10E8_xray_ligand_1.5_RMSD	the crystal structure of the transcriptional regulator, tetr family from cytophaga hutchinsonii	SO4	cytophaga hutchinsonii	transcription regulator
1UQR	10E8_xray_ligand_1.5_RMSD	type ii 3-dehydroquinate dehydratase (dhqase) from actinobacillus pleuropneumoniae	SO4	actinobacillus pleuropneumoniae	lyase
2HYJ	10E8_xray_ligand_1.5_RMSD	the crystal structure of a tetr-family transcriptional regulator from streptomyces coelicolor	SO4	streptomyces coelicolor	transcription
6QOK	10E8_xray_ligand_1.5_RMSD	crystal structure of trmd, a trna-(n1g37) methyltransferase, from mycobacterium abscessus in complex with fragment 14 (methyl 2- aminopyridine-4-carboxylate)	SO4	mycobacterium abscessus	transferase
5AVM	10E8_xray_ligand_1.5_RMSD	crystal structures of 5-aminoimidazole ribonucleotide (air) synthetase, purm, from thermus thermophilus	SO4	thermus thermophilus hb8	ligase
1CR1	pgzl1_ligand_1.5_RMSD	crystal structure of the helicase domain of the gene 4 protein of bacteriophage t7: complex with dttp	SO4	enterobacteria phage t7	transferase
5MIY	pgzl1_ligand_1.5_RMSD	crystal structure of the e3 ubiquitin ligase ravn from legionella pneumophila	SO4	legionella pneumophila	ligase
6QE8	pgzl1_ligand_1.5_RMSD	crystal structure of aspergillus niger gh11 endoxylanase xyna in complex with xylobiose epoxide activity based probe	SO4	aspergillus niger	hydrolase
5NN4	pgzl1_ligand_1.5_RMSD	crystal structure of human lysosomal acid-alpha-glucosidase, gaa, in complex with n-acetyl-cysteine	SO4	homo sapiens	hydrolase
3LUL	10e8_MD_ligand_1.5_RMSD	crystal structure of putative 4-amino-4-deoxychorismate lyase. (yp_094631.1) from legionella pneumophila subsp. pneumophila str. philadelphia 1 at 1.78 a resolution	LLP	legionella pneumophila	lyase
6RSW	10e8_MD_ligand_1.5_RMSD	hfd domain of mouse cap1 bound to the pointed end of g-actin	EPE	oryctolagus cuniculus	contractile protein
2F99	10e8_MD_ligand_1.5_RMSD	crystal structure of the polyketide cyclase aknh with bound substrate and product analogue: implications for catalytic mechanism and product stereoselectivity.	SO4	streptomyces galilaeus	biosynthetic protein
3JZ6	10e8_MD_ligand_1.5_RMSD	crystal structure of mycobacterium smegmatis branched chain aminotransferase in complex with pyridoxal-5'-phosphate at 1.9 angstrom.	PLP	mycobacterium smegmatis	transferase
7LV7	10e8_MD_ligand_1.5_RMSD	crystal structure of branched-chain amino acid aminotransferase from giardia lamblia atcc 50803	LLP	giardia intestinalis	transferase
3I3L	10e8_MD_ligand_1.5_RMSD	crystal structure of cmls, a flavin-dependent halogenase	FAD	streptomyces venezuelae	hydrolase
5BVA	10e8_MD_ligand_1.5_RMSD	structure of flavin-dependent brominase bmp2	FAD	streptomyces	hydrolase
4UU9	10e8_MD_ligand_1.5_RMSD	crystal structure of the human c5a in complex with medi7814 a neutralising antibody	SO4	homo sapiens	immune system
3A0E	10e8_MD_ligand_1.5_RMSD	crystal structure of polygonatum cyrtonema lectin (pcl) complexed with dimannoside	SO4	polygonatum cyrtonema	sugar binding protein
6R5M	10e8_MD_ligand_1.5_RMSD	crystal structure of toxin mt9 from mamba venom	SO4	dendroaspis polylepis	toxin
5BUK	10e8_MD_ligand_1.5_RMSD	structure of flavin-dependent chlorinase mpy16	FAD	streptomyces sp. cnq-418	oxidoreductase
5UAO	10e8_MD_ligand_1.5_RMSD	crystal structure of mibh, a lathipeptide tryptophan 5-halogenase	FAD	microbispora sp. atcc pta-5024	oxidoreductase
1OCY	10e8_MD_ligand_1.5_RMSD	structure of the receptor-binding domain of the bacteriophage t4 short tail fibre	SO4	bacteriophage t4	structural protein
6T21	10e8_MD_ligand_1.5_RMSD	n-terminal domain of ecokmcra restriction endonuclease (neco) in complex with t5mcga target sequence	5CM	escherichia coli (strain k12)	hydrolase
5TUI	10e8_MD_ligand_1.5_RMSD	crystal structure of tetracycline destructase tet(50) in complex with chlortetracycline	SO4	uncultured bacterium	oxidoreductase
6K8V	10e8_MD_ligand_1.5_RMSD	crystal structure of n-domain of baterial malonyl-coa reductase	SO4	porphyrobacter dokdonensis dsw-74	oxidoreductase
6JIF	10e8_MD_ligand_1.5_RMSD	crystal structures of branched-chain aminotransferase from pseudomonas sp. uw4	PLP	pseudomonas sp. uw4	transferase
1O57	10e8_MD_ligand_1.5_RMSD	crystal structure of the purine operon repressor of bacillus subtilis	SO4	bacillus subtilis	dna binding protein
6XGS	10e8_MD_ligand_1.5_RMSD	crystal structure of dihydrodipicolinate synthase (dhdps) from brucella suis 1330	PO4	brucella suis biovar 1	biosynthetic protein, lyase
3GG8	10e8_MD_ligand_1.5_RMSD	crystal structure of the toxoplasma gondii pyruvate kinase n terminal truncated	SO4	toxoplasma gondii	transferase
3WUD	10e8_MD_ligand_1.5_RMSD	x-ray crystal structure of xenopus laevis galectin-ib	SO4	xenopus laevis	sugar binding protein
4TVI	10e8_MD_ligand_1.5_RMSD	x-ray crystal structure of an aminotransferase from brucella abortus bound to the co-factor plp	LLP	brucella abortus	transferase
2Y4R	10e8_MD_ligand_1.5_RMSD	crystal structure of 4-amino-4-deoxychorismate lyase from pseudomonas aeruginosa	PLP	pseudomonas aeruginosa	lyase
2YIL	10e8_MD_ligand_1.5_RMSD	crystal structure of parasite sarcocystis muris lectin sml-2	SO4	sarcocystis muris	sugar binding protein
3CW9	10e8_MD_ligand_1.5_RMSD	4-chlorobenzoyl-coa ligase/synthetase in the thioester-forming conformation, bound to 4-chlorophenacyl-coa	AMP	alcaligenes sp.	ligase
2OVR	10e8_MD_ligand_1.5_RMSD	structure of the skp1-fbw7-cyclinedegn complex	SO4	homo sapiens	transcription/cell cycle
3UGF	10e8_MD_ligand_1.5_RMSD	crystal structure of a 6-sst/6-sft from pachysandra terminalis	SO4	pachysandra terminalis	transferase
5IOB	10e8_MD_ligand_1.5_RMSD	crystal structure of beta-n-acetylglucosaminidase-like protein from corynebacterium glutamicum	MES	corynebacterium glutamicum (strain atcc 13032 /dsm 20300 / jcm 1318 / lmg 3730 / ncimb 10025)	hydrolase
1HM6	10e8_MD_ligand_1.5_RMSD	x-ray structure of full-length annexin 1	SO4	sus scrofa	metal, lipid binding protein
3CSW	10e8_MD_ligand_1.5_RMSD	crystal structure of a putative branched-chain amino acid aminotransferase (tm0831) from thermotoga maritima at 2.15 a resolution	PLP	thermotoga maritima msb8	transferase
6Q1S	10e8_MD_ligand_1.5_RMSD	a hypothetical aminotransferase from mycobacterium tuberculosis, alpha-ketoglutarate and pmp bound form	PMP	mycobacterium tuberculosis (strain atcc 25618 /h37rv)	transferase
1M0W	10e8_MD_ligand_1.5_RMSD	yeast glutathione synthase bound to gamma-glutamyl-cysteine, amp-pnp and 2 magnesium ions	SO4	saccharomyces cerevisiae	ligase
6UL2	10e8_MD_ligand_1.5_RMSD	crystal structure of tryptophan-6-halogenase borh complexed with l- tryptophan	SO4	uncultured bacterium	flavoprotein
6NSD	10e8_MD_ligand_1.5_RMSD	tar14, tryptophan c-6 flavin-dependent halogenase (chlorinase) from taromycin biosynthesis	FAD	saccharomonospora sp. cnq490	biosynthetic protein
4NZF	10e8_MD_ligand_1.5_RMSD	crystal structure of abp-d197a (a gh27-b-l-arabinopyranosidase from geobacillus stearothermophilus), in complex with arabinose	SO4	geobacillus stearothermophilus	hydrolase
4PZ7	10e8_MD_ligand_1.5_RMSD	pce1 guanylyltransferase	SO4	schizosaccharomyces pombe	transferase
5WGX	10e8_MD_ligand_1.5_RMSD	crystal structure of mala' h253a, malbrancheamide b complex	FAD	malbranchea aurantiaca	oxidoreductase/oxidoreductase inhibitor
1I2K	10e8_MD_ligand_1.5_RMSD	aminodeoxychorismate lyase from escherichia coli	PLP	escherichia coli	lyase
5EWO	10e8_MD_ligand_1.5_RMSD	crystal structure of the human astrovirus 1 capsid protein spike domain at 0.95-a resolution	SO4	human astrovirus-1	viral protein
2YDT	10e8_MD_ligand_1.5_RMSD	structure of the alpha-l-arabinofuranosidase arb93a from fusarium graminearum in complexe with an iminosugar inhibitor	SO4	gibberella zeae	hydrolase
6NST	10e8_MD_ligand_1.5_RMSD	crystal structure of branched chain amino acid aminotransferase from pseudomonas aeruginosa	SO4	pseudomonas aeruginosa (strain atcc 15692 / dsm22644 / cip 104116 / jcm 14847 / lmg 12228 / 1c / prs 101 / pao1)	transferase
4PQQ	10e8_MD_ligand_1.5_RMSD	the crystal structure of discoidin domain from muskelin	PO4	mus musculus	protein binding
2XIW	10e8_MD_ligand_1.5_RMSD	crystal structure of the sac7d-derived igg1-binder c3-c24s	SO4	sulfolobus acidocaldarius	dna binding protein
4G1Q	10e8_MD_ligand_1.5_RMSD	crystal structure of hiv-1 reverse transcriptase (rt) in complex with rilpivirine (tmc278, edurant), a non-nucleoside rt-inhibiting drug	SO4	human immunodeficiency virus type 1	transferase, hydrolase/inhibitor
3M4F	10e8_MD_ligand_1.5_RMSD	structural insights into the acidophilic ph adaptation of a novel endo-1,4-beta-xylanase from scytalidium acidophilum	CXS	scytalidium acidophilum	hydrolase
5MP6	10e8_MD_ligand_1.5_RMSD	structure of the unliganded fab from hiv-1 neutralizing antibody cap248-2b that binds to the gp120 c-terminus - gp41 interface, at two angstrom resolution.	SO4	homo sapiens	immune system
6BB9	10e8_MD_ligand_1.5_RMSD	the crystal structure of 4-amino-4-deoxychorismate lyase from salmonella typhimurium lt2	MES	salmonella typhimurium	lyase
2AQJ	10e8_MD_ligand_1.5_RMSD	the structure of tryptophan 7-halogenase (prna) suggests a mechanism for regioselective chlorination	FAD	pseudomonas fluorescens	biosynthetic protein
4CU7	10e8_MD_ligand_1.5_RMSD	unravelling the multiple functions of the architecturally intricate streptococcus pneumoniae beta-galactosidase, bgaa	SO4	streptococcus pneumoniae tigr4	hydrolase
4K6N	10e8_MD_ligand_1.5_RMSD	crystal structure of yeast 4-amino-4-deoxychorismate lyase	PLP	saccharomyces cerevisiae	lyase
6Q0S	10e8_MD_ligand_1.5_RMSD	crystal structure of rsv strain b18537 prefusion-stabilized glycoprotein f variant ds-cav1	SO4	human respiratory syncytial virus (subgroup b /strain 18537)	immune system
6UI5	10e8_MD_ligand_1.5_RMSD	tmn9 in complex with cofactor fad	FAD	streptomyces sp. nrrl 11266	oxidoreductase
3NYQ	10e8_MD_ligand_1.5_RMSD	malonyl-coa ligase ternary product complex with methylmalonyl-coa and amp bound	AMP	streptomyces coelicolor	ligase
2GFQ	10e8_MD_ligand_1.5_RMSD	structure of protein of unknown function ph0006 from pyrococcus horikoshii	SO4	pyrococcus horikoshii	structural genomics, unknown function
RSMD Cutoff (Å)	Hits	RSMD Cutoff (Å)	Hits
4e10_CDRH1		10e8_FRL3
3	3103691	3	3675122
2.5	665906	2.5	1595534
2	53489	2	504500
1.5	3906	1.5	129694
1	864	1	39569
0.5	2	0.5	2
Query Structure	RSMD Cutoff (Å)	Hits	Topology
10e8_FRL3	2	504500	7 aa loop (beta-loop-beta)
3U1S_FRL3	2	530769	PGT145 Ab FRL3 loop (7 aa between 2 beta sheets)
8ABP_A_10-16	2	1122431	7 AA loop beta-loop-helix
5MEB_B_543-549	2	504898	7 AA loop helix- loop -helix
4e10_CDRH1	2	53489	10 aa loop (beta-loop-beta)
3U1S_CDRH1	2	154014	PGT145 Ab cdrh1 loop (10 aa between 2 beta sheets)
2QTF_A_332-341	2	11359	10 aa loop (beta-loop-helix)
4LLS_B_159_168	2	187764	10 aa loop (helix-loop-helix)
