# Supplementary material for: Ab initio prediction of specific phospholipid complexes and membrane association of HIV-1 MPER antibodies by multi-scale simulations
Source: eLife. 2025 Apr 7;12:RP90139. doi: 10.7554/eLife.90139 (PMC11975376; doi:10.7554/eLife.90139)
Supplement: Figure 4—source data 1. — Description of 14 µs coarse grain simulations for spontaneously inserting 4E10, PGZl1, and 10E8 antibody Fabs. Description of 10 µs coarse grain simulations for negative control systems using BSA and 13h11 Fab are included. Membrane association time is reported for each replicate that was initiated from various orientations relative to the membrane plane, along with total membrane contact time for each Fab system. Average contact time and standard deviation from total membrane contact time is reported. Average contact time and standard deviation per each association event in each antibody systems is also reported. [file elife-90139-fig4-data1.xlsx]

## Sheet: Sheet1
Antibody/	Membrane Contact Time (µs)		Membrane Contact Time (µs)		Membrane Contact Time (µs)		Membrane Contact Time (µs)		Membrane Contact Time (µs)
Replicate
40000000000		PGZL1		1000000000		BSA		13h11
1	7.38	1	10.65	1	9.75	1	0.06	1	0.33
2	1.62	2	12.27	2	3.66	2	1.71	2	0.12
3	0.87	3	10.53	3	0.03	3	0	3	0
4	9.54	4	11.88	4	11.82	4	0.09	4	0.03
5	0.87	5	7.47	5	0.03	5	0	5	0.03
6	11.82	6	9	6	11.07	6	0.06	6	0.24
7	0.09	7	9.66	7	11.13	7	0	7	0.06
8	2.94	8	0.06	8	12.42	8	0.03	8	0.27
9	0.12	9	5.55	9	5.16	9	0	9	0.33
10	0.06	10	0	10	5.58	10	0.03	10	0
11	9.54	11	5.04	11	11.88	11	0	11	0.54
12	12	12	0	12	0.09	12	0.06	12	0.15
13	6.24	13	2.76	13	0.06	13	0.06	13	0.03
14	0	14	10.62	14	0	14	0.06	14	0.27
15	12.93	15	8.4	15	1.14	15	3.78	15	0.03
16	0.21	16	12.48	16	2.28	16	0.06	16	0
17	11.31	17	11.4	17	0.48	17	0.12	17	0.03
18	0.12	18	0.09	18	3.48	18	0.09	18	0.12
Total (µs)	87.66		127.86		90.06		6.18		2.58
Average Aggregated Time ± S.D.	4.87±5.08		7.10±4.67		5.0±4.94		0.35±0.94		0.14±0.15
Average Association Event Time ± S.D	2.87±4.18		1.36±2.0		1.3±1.41		0.57±0.91		0.21±07
Total Time Sampled (µs)	252		252		252		180		180
